# Supplementary material for: Highly enantioselective spiro cyclization of 1,6-enynes catalyzed by cationic skewphos rhodium(i) complex
Source: Royal Society of Chemistry journal article supplement (doi:10.1039/b310789b), 2003-12-19
Supplement: b310789b.doc [file b310789b.doc]

**Supporting information**

**Highly Enantioselective Spiro Cyclization of 1,6-enynes Catalyzed by Cationic Skewphos Rhodium(I) Complex**

**Koichi Mikami*, Yukinori Yusa, Kazuki Wakabayashi, Kohsuke Aikawa and Manabu Hatano**

[*] Prof. Dr. K. Mikami

Department of Applied Chemistry

Graduate School of Science and Engineering

Tokyo Institute of Technology

O-okayama, Meguro-ku, Tokyo 152-8552 (Japan)

Fax: Int. code (+81)3-5734-2776

E-mail: [kmikami@o.cc.titech.ac.jp](mailto:kmikami@o.cc.titech.ac.jp)

**General:**

1H NMR, 13C NMR and 31P NMR spectra were measured on a Varian GEMINI 300 (300 MHz) and Varian GEMINI 400 (400 MHz) spectrometers. Chemical shift of 1H NMR were expressed in parts per million downfield from tetramethylsilane as an internal standard (= 0) in CDCl3, unless otherwise noted. Chemical shifts of 13C NMR were expressed in parts per million downfield from CDCl3 as an internal standard (= 77.1) in CDCl3, unless otherwise noted. Chemical shifts of 31P NMR were expressed in parts per million downfield from 85% H3PO4 as an internal standard (= 0) in CDCl3, unless otherwise noted. IR spectra were measured on a JASCO FT/IR-5000 spectrometer. Optical rotations were measured on a JASCO DIP-370. Liquid chromatographic analyses (HPLC) were conducted on a JASCO PU-980, LG-980-02, DG-980-50, AS-950 and CO-966 instrument equipped with model UV-975 spectrometers as an ultra violet light. Peak area were calculated by JASCO-BORWIN (Windows NT) as an automatic integrator. Capillary gas chromatographic analyses (GC) were conducted on a Shimadzu GC-14B instrument equipped with FID detector by using N2 (75 kPa) as a carrier gas; Peak area were calculated by a Shimadzu C-R6A as an automatic integrator; Chiral column were CP-Cyclodextrin--2,3,6-M-19 (i.d. 0.25 mm x 25 m; CHROMPACK; GL Sciences Inc.) and CP-Chirasil-Dex CB (i.d. 0.32 mm x 25 m; CHROMPACK; GL Sciences Inc.); Split ratio was 100:1. Analytical thin layer chromatography (TLC) were performed on a glass plates (Merck Kieselgal 60 F254, layer thickness 0.25 and 0.2 mm). Visualization was accomplished by UV light (254 nm), anisaldehyde, KMnO4 and phosphomolybdic acid. Column chromatography was performed on KANTO Silica Gel 60N (spherical, neutral). All experiments were carried out under argon atmosphere otherwise noted.

# Chemicals

(Bicyclo[2.2.1]hepta-2,5-diene)chlororhodium(I) dimmer ([Rh(nbd)Cl]2) was purchased from Strem Chemicals, Inc.

Diethyl ether (dehydrate), benzene (dehydrate), toluene (dehydrate), dichloromethane (dehydrate), tetrahydrofuran (dehydrate), hexane (dehydrate), DMF (dehydrate), DMA (dehydrate) and acetnitrile (dehydrate) were purchased from Kanto chemical Co., Inc.

# General Procedure for Rh Catalyzed Ene-type Cyclization

To a [Rh(*P-P*)(nbd)]SbF6  (0.02 mmol) in 10 ml schlenk tube was added dry CH2Cl2 (0.8 ml) under Ar atmosphere. A solution was freezed and charged with hydrogen gas using balloon (1 atm), then stirred for 30 min at room temperature. After exchange with Ar again, CH2Cl2 (1.2 ml) and substrate (0.20 mmol) was added. The mixture was stirred at desired temperature under Ar atmosphere and reaction was monitored by TLC. The crude mixture was purified by neutral silica-gel column chromatography to give the cyclization product.

**[Rh{(*S,S*)-skewphos}(nbd)]SbF6**

A Schlenk tube was charged under Ar with [Rh(nbd)Cl]2 (138.3 mg, 0.30 mmol) and THF (3 ml) was added. Then, a solution of AgSbF6 (275.0 mg, 0.80 mmol) in THF (2 ml), previously prepared in another schlenk tube, was added *via* cannula. After stirring for an additional 30 min, the AgCl precipitate was removed by filtration under Ar through a bed of celite. To the turbid filtrates, which formed occasionally, THF (5.0 ml) solution of (*S,S*)-skewphos (264.3 mg, 0.60 mmol) was slowly added *via* cannula. After stirring for 1 h, solvent was removed, then CH2Cl2 (8 ml) was added. This solution was allowed to settle at 0 C overnight. The supernatant clear red solution was then transferred *via* syringe to another schlenk tube (or Celite filtration under Ar atmosphere). The titled compound was isolated (quant., orange powder) by concentrating the mixture in vacuo, addition of a few ml of Et2O, removal supernatant liquid *via* syringe, washing with Et2O, and drying *in vacuo*.

1H NMR (300 MHz, CDCl3) 1.15 (m, 6H, 2C*H*3), 1.60 (brs, 2H, C*H*2 of nbd), 1.86(m, 2H, C*H*2 of BDPP), 2.80 (m, 2H, 2C*H* of BDPP), 3.94 (m, 2H, 2C*H* of nbd), 4.34 (s, 2H, C*H*=), 4.88 (s, 2H, C*H*=), 7.40-7.76 (m, 20H).

31P NMR (162 MHz, CDCl3) 27.8 (d, *J* = 149.5 Hz).

**(*S,S*)-skewphos-Rh(I) catalyst**

To a [Rh{(*S,S*)-skewphos}(nbd)]SbF6 complex (17.4 mg, 0.02 mmol) in 10 ml schlenk tube was added dry CH2Cl2 (0.5 ml). A mixture was freezed and charged with hydrogen gas using balloon (1 atm), then stirred for 30 min at room temperature.

31P NMR of this obtained complex indicates the mixture of three dimeric-species and the ratio is 7:2:1 (= A:B:C). Each of them has the coupling of Rh-P and P-P, which strongly suggests the dimeric complexes. Crystalization of cationic skewphos-Rh(I) complexes for X-ray analyses are now under way.

A: 42.5 ppm (dd, *J* Rh-P= 182 Hz, *J* P-P= 57.0 Hz), 49.4 ppm (dd, *J* Rh-P= 209 Hz, *J* P-P= 54.6 Hz).

B: 38.4 ppm (dd, *J* Rh-P= 231 Hz, *J* P-P= 59.9 Hz), 45.6 ppm (dd, *J* Rh-P= 201 Hz, *J* P-P= 62.2 Hz).

C: 30.5 ppm (dd, *J* Rh-P= 179 Hz, *J* P-P= 57.7 Hz), 50.0 ppm (dd, *J* Rh-P= 195 Hz, *J* P-P= 58.3 Hz).

In anyway, dimeric species is a catalyst precursor for active momomeric Rh(I) complex as X.Zhang et al havre reported. See the ref.

A. Lei, J. P. Waldkirch, M. He, X. Zhang, *Angew. Chem. Int. Ed.,* 2002, **41**, 4526-4529.

See the following refs for the dimeric Rh(I) complexes.

J. Halpern, D. P. Riley, A. S. C. Chan, J. J. Pluth, *J. Am. Chem. Soc.,* 1977, **99**, 8055-8057.

1. Miyashita, H. Takaya, T. Souchi, R. Noyori, *Tetrahedron*, 1984, **40**, 1245-1253.

I. D. Gridnev, N. Higashi, K. Asakura, T. Imamoto, *J. Am. Chem. Soc.,* 2002, **122**, 7183-7194.

**(4-Methyl-4-vinyl-dihydrofuran-3-ylidene)-acetic acid methyl ester**

1H NMR (300 MHz, CDCl3) 1.26 (s, 3H),3.62 (d, *J* = 8.7 Hz, 1H), 3.69 (s, 3H), 3.72 (d, *J* = 9.0 Hz, 1H), 4.77 (dd, *J* = 17.7, 2.4 Hz, 1H), 5.16 (d, *J* = 11.1 Hz, 1H), 5.17 (d, *J* = 17.7 Hz, 1H), 5.63 (t, *J* = 2.4 Hz, 1H), 5.79 (dd, *J* = 17.7, 10.5 Hz, 1H).

13C NMR (75 MHz, CDCl3) 22.2 50.7, 51.4, 72.2, 78.3, 111.0, 114.9, 140.7, 166.8, 169.4.

IR (neat) 2934, 2848, 1717, 1667, 1437, 1354, 1224, 1168, 1065, 1021, 930 cm-1.

GC (column, CP-Cyclodextrin--2,3,6-M-19, i.d. 0.25 mm x 25 m, CHROMPACK; carrier gas, nitrogen 75 kPa; column, 105 C; injection and detection temp, 135 C; split ratio, 100 : 1), tR of *R*-isomer 40.2 min, tR of *S*-isomer 42.5 min.

**(4-Methyl-4-vinyl-4,5-dihydrofuran-3-yl)-acetic acid methyl ester**

1H NMR (300 MHz, CDCl3) 1.20 (s, 3H),2.90 (m, 2H), 3.67 (s, 3H), 4.02 (dd, *J* = 8.7 0.9 Hz, 1H), 4.15 (d, *J* = 8.7 Hz, 1H), 5.04 (d, *J* = 17.1 Hz, 1H), 5.08 (d, *J* = 10.5 Hz, 1H), 5.82 (dd, *J* = 17.4, 10.5 Hz, 1H), 6.36 (t, *J* = 1.5 Hz, 1H).

GC (column, CP-Cyclodextrin--2,3,6-M-19, i.d. 0.25 mm x 25 m, CHROMPACK; carrier gas, nitrogen 75 kPa; column, 105 C; injection and detection temp, 135 C; split ratio, 100 : 1), tR of *S*-isomer 29.9 min, tR of *R*-isomer 30.6 min.

[4-Methyl-1-(toluene-4-sulfonyl)-4-vinyl-pyrrolidin-3-ylidene]-acetic acid methyl ester

1H NMR (300 MHz, CDCl3) 1.27 (s, 3H),2.43 (s, 3H), 3.09 (d, *J* = 9.6 Hz, 1H), 3.14 (d, *J* = 9.0 Hz, 1H), 3.68 (s, 3H), 4.19 (dd, *J* = 18.0, 2.7 Hz, 1H), 4.41 (dd, *J* = 18.3, 2.4 Hz, 1H), 5.15 (d, *J* = 11.1 Hz, 1H), 5.16 (d, *J* = 17.4 Hz, 1H), 5.60 (t, *J* =2.7 Hz, 1H), 5.69 (dd, *J* = 17.4, 10.8 Hz, 1H), 7.33 (d, *J* =8.1 Hz, 2H), 7.72 (d, *J* =8.1 Hz, 2H).

13C NMR (75 MHz, CDCl3) 21.6, 23.1, 49.8, 51.5, 52.2, 58.3, 112.9, 115.4, 128.0, 129.8, 140.2, 143.9, 164.3, 166.3.

IR (neat) 2928, 2856, 1715, 1667, 1601, 1437, 1340 cm-1.

HPLC (column, CHIRALCEL OD-H, Hexane/2-propanol = 95 : 5, flow rate 0.6 ml/min, 15 C, detection UV 254 nm) tR of *R*-isomer 21.7 min, tR of *S*-isomer 24.0 min.

**[4-Methyl-1-(toluene-4-sulfonyl)-4-vinyl-4,5-dihydro-1H-pyrrol-3-yl]- acetic acid methyl ester**

1H NMR (300 MHz, CDCl3) 1.27 (s, 3H),2.43 (s, 3H), 2.84 (m, 2H), 3.26 (dd, *J* = 10.2, 1.2 Hz, 1H), 3.36 (dd, *J* = 10.5, 0.9 Hz, 1H), 3.66 (s, 3H), 4.88 (dd, *J* = 17.4, 0.9 Hz, 1H), 4.97 (dd, *J* = 10.8, 0.6 Hz, 1H), 5.50 (dd, *J* = 17.4, 10.2 Hz, 1H), 6.42 (t, *J* = 1.5 Hz, 1H), 7.33 (d, *J* = 8.7 Hz, 2H), 7.68 (d, *J* = 8.1 Hz, 2H).

**(2-Oxa-spiro[4.5]dec-6-en-4-ylidene)-acetic acid methyl ester**

1H NMR (300 MHz, CDCl3) 1.40-2.22 (6H), 3.50 (d, *J* = 8.4 Hz, 1H), 3.71 (s, 3H), 3.82 (d, *J* = 8.7 Hz, 1H), 4.70 (dd, *J* = 17.7, 2.7 Hz, 1H), 4.98 (dd, *J* = 17.7, 2.7 Hz, 1H), 5.30 (dm, *J* = 10.2 Hz, 1H), 5.67 (t, *J* = 2.4 Hz, 1H), 5.99 (dt, *J* = 10.2, 3.6 Hz, 1H).

GC (Chiral Capillary Column, CP-Chirasil-Dex CB, 135 C, INJ/DET 165 C)

tR of *S*-isomer 22.7 min, tR of *R*-isomer 24.4 min.

**(2-Oxa-spiro[4.5]deca-3,6-dien-4-yl)-acetic acid methyl ester**

1H NMR (300 MHz, CDCl3) 1.40-2.22 (6H), 2.93 (m, 2H), 3.67 (s, 3H), 3.98 (d, *J* = 9.0 Hz, 1H), 4.11 (d, *J* = 9.0 Hz, 1H), 5.43 (dm, *J* = 9.9 Hz, 1H), 5.83 (dt, *J* = 9.9, 3.6 Hz, 1H), 6.34 (m, 1H).

GC (Chiral Capillary Column, CP-Chirasil-Dex CB, 125 C, INJ/DET 155 C)

tR of *S*-isomer 31.8 min, tR of *R*-isomer 32.6 min.

**(2-Oxa-spiro[4.7]dodec-6-en-4-ylidene)-acetic acid methyl ester**

1H NMR (300 MHz, CDCl3) 0.70-2.60 (10H), 3.53 (d, *J* = 8.7 Hz, 1H), 3.70 (s, 3H), 3.98 (d, *J* = 8.7 Hz, 1H), 4.69 (dd, *J* = 17.7, 2.4 Hz, 1H), 4.91 (dd, *J* = 17.7, 2.4 Hz, 1H), 5.37 (d, *J* = 11.7 Hz, 1H), 5.60 (dd, *J* = 12.0, 8.4 Hz, 1H), 5.71 (t, *J* = 2.4 Hz, 1H).

13C NMR (75 MHz, CDCl3) 23.4, 24.5, 25.3, 26.4, 51.2, 71.5, 76.3, 111.1, 129.1, 133.2.

IR (neat) 2932, 2856, 1717, 1663, 1582, 1437, 1352, 1265, 1214, 1131, 1073 cm-1.

GC (Chiral Capillary Column, CP-Chirasil-Dex CB, 145 C, INJ/DET 180 C), tR of *S*-isomer 42.5 min , tR of *R*-isomer 45.2 min.

**(2-Oxa-spiro[4.7]dodeca-3,6-dien-4-yl)-acetic acid methyl ester**

1H NMR (300 MHz, CDCl3) 0.70-2.60 (10H), 2.96 (m, 2H), 3.67 (s, 3H), 4.14 (dd, *J* = 8.7, 1.2 Hz, 1H), 4.25 (d, *J* = 8.7 Hz, 1H), 5.46 (m, 2H), 6.28 (t, *J* = 1.5 Hz, 1H).

GC (Chiral Capillary Column, CP-Chirasil-Dex CB, 135 C, INJ/DET 165 C), tR of *S*-isomer 60.2 min, tR of *R*-isomer 61.6 min.

[2-(Toluene-4-sulfonyl)-8-oxa-2-aza-spiro[4.5]dec-6-en-4-ylidene]-acetic acid methyl ester

1H NMR (300 MHz, CDCl3) 1.72 (m, 1H),2.05 (m, 1H), 2.43 (s, 3H), 2.69 (d, *J* = 9.6 Hz, 1H), 3.68 (s, 3H), 3.85-4.10 (2H), 3.98 (dd, *J* = 18.3, 2.4 Hz, 1H), 4.23 (d, *J* = 6.3 Hz, 1H), 4.59 (dd, *J* = 18.3, 2.4 Hz, 1H), 5.73 (t, *J* = 3.0 Hz, 1H), 6.57 (d, *J* = 6.3 Hz, 1H), 7.34 (d, *J* = 8.1 Hz, 2H), 7.72 (d, *J* = 7.8 Hz, 2H).

13C NMR (75 MHz, CDCl3) 21.6, 34.0, 44.6, 51.5, 51.8, 58.3, 62.8, 101.1, 113.6, 128.0, 129.9, 132.1, 144.0, 147.6, 165.0, 166.3.

IR (neat) 2930, 1717, 1644, 1352, 1247, 1166 cm-1.

HPLC (column, CHIRALCEL AD-H, Hexane/2-propanol = 85 : 15, flow rate 1.0 ml/min, 28 C, detection UV 254 nm) tR of *S*-isomer 16.0 min, tR of *R*-isomer 23.5 min.
